# Supplementary material for: Transcutaneous electrical acupoint stimulation for pregnancy outcomes in women undergoing in vitro fertilization-embryo transfer: A systematic review and meta-analysis
Source: PubMed Central journal article supplement (PMC9403762; doi:10.3389/fpubh.2022.892973), 2022-08-11
Supplement: Table_1.pdf [file Table_1.pdf]

## Supplementary Table 1 The Search Strategy of English Electronic Databases.

### Medline (Ovid)

- 1 "nerve stimulat\*".ab,ti.
- 2 electroacupuncture.ab,ti.
- 3 neuro modulation.ab,ti.
- 4 electro acupuncture.ab,ti.
- 5 neuromodulation.ab,ti.
- 6 "trans-abdominal stimulat\*".ab,ti.
- 7 "transcutaneous electr\* stimulat\*".ab,ti.
- 8 "interferential electr\* stimulat\*".ab,ti.
- 9 medtronic.ab,ti.
- 10 or/1-9
- 11 exp embryo transfer/ or exp fertilization in vitro/ or exp sperm injections, intracytoplasmic/ or exp zygote intrafallopian transfer/
- 12 (in Vitro adj2 fertili\$.tw.
- 13 (ivf or icsi or ZIFT).tw.
- 14 (intracytoplas\$ adj2 sperm).tw.
- 15 zygote intrafallopian transfer\$.tw.
- 16 (embryo transfer\$ or ET).tw.
- 17 invitro fertili\$.tw.
- 18 or/11-17
- 19 randomized controlled trial.pt.
- 20 controlled clinical trial.pt.
- 21 randomized.ab.
- 22 placebo.tw.
- 23 clinical trials as topic.sh.
- 24 randomly.ab.
- 25 trial.ti.
- 26 (crossover or cross-over or cross over).tw.
- 27 or/19-26
- 28 exp animals/ not humans.sh.
- 29 27 not 28
- 30 10 and 18 and 29

### Cochrane Library

- #1 nerve stimulat\*:ti,ab,kw
- #2 electro-acupuncture:ti,ab,kw
- #3 electroacupuncture:ti,ab,kw
- #4 neuro-modulation:ti,ab,kw
- #5 neuromodulation:ti,ab,kw
- #6 trans-abdominal stimulat\*:ti,ab,kw
- #7 sacral nerve stimulat\*:ti,ab,kw
- #8 transcutaneous electr\* stimulat\*:ti,ab,kw

#9 interferential electr\* stimulat\*:ti,ab,kw  
#10 "medtronic":ti,ab,kw  
#11 "SXDZ-100":ti,ab,kw  
#12 "SDZ-II":ti,ab,kw  
#13 #1 or #2 or #3 or #4 or #5 or #6 or #7 or #8 or #9 or #10 or #11 or #12  
#14 exp embryo transfer or exp fertilization in vitro or exp sperm injections,  
intracytoplasmic or exp zygote intrafallopian transfer  
#15 (in Vitro adj2 fertili\$).tw.  
#16 (ivf or icsi or ZIFT).tw.  
#17 (intracytoplas\$ adj2 sperm).tw.  
#18 zygote intrafallopian transfer\$.tw.  
#19 (embryo transfer\$ or ET).tw.  
#20 invitro fertili\$.tw.  
#21 #14 or #15 or #16 or #17 or #18 or #19 or #20  
#22 #13 and #21

### **EMbase (Ovid)**

1 "nerve stimulat\*".ab,ti.  
2 electro-acupuncture.ab,ti.  
3 electroacupuncture.ab,ti.  
4 neuro-modulation.ab,ti.  
5 neuromodulation.ab,ti.  
6 "trans-abdominal stimulat\*".ab,ti.  
7 "sacral nerve stimulat\*".ab,ti.  
8 "transcutaneous electr\* stimulat\*".ab,ti.  
9 "medtronic".ab,ti.  
10 "SXDZ-100".ab,ti.  
11 or/1-10  
12 exp fertilization in vitro/  
13 exp intracytoplasmic sperm injection/  
14 exp embryo transfer/  
15 (in?Vitro adj2 fertili\$).tw.  
16 (ivf or icsi or ZIFT).tw.  
17 (intracytoplas\$ adj2 sperm).tw.  
18 zygote intrafallopian transfer\$.tw.  
19 embryo transfer\$.tw.  
20 invitro fertili\$.tw.  
21 or/12-20  
22 Clinical Trial/  
23 Randomized Controlled Trial/  
24 exp randomization/  
25 Single Blind Procedure/  
26 Double Blind Procedure/  
27 Crossover Procedure/

28 Placebo/  
29 Randomized controlled trial\$.tw.  
30 Rct.tw.  
31 random allocation.tw.  
32 randomly allocated.tw.  
33 allocated randomly.tw.  
34 (allocated adj2 random).tw.  
35 Single blind\$.tw.  
36 Double blind\$.tw.  
37 ((treble or triple) adj blind\$).tw.  
38 placebo\$.tw.  
39 prospective study/  
40 or/22-39  
40 11 and 21 and 40

### **PsycINFO (Ovid)**

1 "nerve stimulat\*".ab,ti.  
2 electro-acupuncture.ab,ti.  
3 electroacupuncture.ab,ti.  
4 neuro-modulation.ab,ti.  
5 neuromodulation.ab,ti.  
6 "transcutaneous electr\* stimulat\*".ab,ti.  
7 or/1-6  
8 (in?Vitro adj2 fertili\$).tw.  
9 (ivf or icsi or ZIFT).tw.  
10 (intracytoplas\$ adj2 sperm).tw.  
11 zygote intrafallopian transfer\$.tw.  
12 embryo transfer\$.tw.  
13 invitro fertili\$.tw.  
14 or/8-13  
15 random.tw.  
16 control.tw.  
17 double-blind.tw.  
18 clinical trials/  
19 placebo/  
20 exp Treatment/  
21 or/15-20  
22 7 and 14 and 21

### **CINAHL**

S1 transcutaneous electrical nerve stimulation.  
S2 ("transcutaneous electric\* nerve stimulation" OR "transcutaneous nerve stimulation").ti,ab  
S3 AB "nerve stimulat\*"

S4 AB electro-acupuncture  
S5 AB electroacupuncture  
S6 AB neuro-modulation  
S7 AB neuromodulation  
S8 AB "transcutaneous electr\* stimulat\*"  
S9 S1 OR S2 OR S3 OR S4 OR S5 OR S6 OR S7 OR S8  
S10 TX vitro fertilisation  
S11 (MM "Fertilization in Vitro")  
S12 TX IVF or TX ICSI  
S13 TX ovari\* N3 stimulat\*  
S14 TX ovar\* N3 hyperstimulat\*  
S15 TX embryo\* N3 transfer\*  
S16 TX vitro fertilization  
S17 S10 OR S11 OR S12 OR S13 OR S14 OR S15 OR S16  
S18 (MH "Clinical Trials+")  
S19 PT Clinical trial  
S20 TX clinic\* n1 trial\*  
S21 TX ( (trebl\* n1 blind\*) or (trebl\* n1 mask\*) )  
S22 TX ( (singl\* n1 blind\*) or (singl\* n1 mask\*) ) or TX ( (doubl\* n1 blind\*) or  
(doubl\* n1 mask\*) ) or TX ( (tripl\* n1 blind\*) or (tripl\* n1 mask\*) ) or TX ( (trebl\*  
n1 blind\*) or (trebl\* n1 mask\*) )  
S23 TX randomi\* control\* trial\*  
S24 (MH "Random Assignment")  
S25 TX random\* allocat\*  
S26 TX placebo\*  
S27 (MH "Placebos")  
S28 (MH "Quantitative Studies")  
S29 TX allocat\* random\*  
S30 S18 OR S19 OR S20 OR S21 OR S22 OR S23 OR S24 OR S25 OR S26 OR S27  
OR S28 OR S29  
S31 S9 AND S17 AND S30
