# Supplementary material for: Transcutaneous electrical acupoint stimulation for pregnancy outcomes in women undergoing in vitro fertilization-embryo transfer: A systematic review and meta-analysis
Source: PubMed Central journal article supplement (PMC9403762; doi:10.3389/fpubh.2022.892973), 2022-08-11
Supplement: Table_2.pdf [file Table_2.pdf]

Supplementary Table 2 The List of Excluded Studies in the Secondary Screening.

| <b>Author/Year</b> | <b>Title</b>                                                                                                                                                                                           | <b>Reason for exclusion</b>                  |
|--------------------|--------------------------------------------------------------------------------------------------------------------------------------------------------------------------------------------------------|----------------------------------------------|
| Qu et al., 2015    | Transcutaneous electrical acupoint stimulation improves outcomes of in vitro fertilization by increasing neuropeptide Y levels: A RCT                                                                  | Duplicate published data                     |
| Shuai et al., 2015 | Effect of transcutaneous electrical acupuncture point stimulation on endometrial receptivity in women undergoing frozen-thawed embryo transfer: a single-blind prospective randomized controlled trial | Duplicate published data                     |
| Zheng et al., 2016 | Effects of transcutaneous electrical acupoint stimulation on ovarian reserve of patients with diminished ovarian reserve in IVF-ET                                                                     | Duplicate published data                     |
| Gay et al., 2018   | Evaluation of “Energy Resonance by Cutaneous Stimulation” Among Women Treated by In Vitro Fertilization                                                                                                | The interventions being studied weren’t TEAS |
| Zhong et al., 2017 | Transcutaneous electrical acupoint stimulation for pregnancy of in vitro fertilization-embryo transfer                                                                                                 | Non-RCT                                      |
