# Supplementary material for: Transcutaneous electrical acupoint stimulation for pregnancy outcomes in women undergoing in vitro fertilization-embryo transfer: A systematic review and meta-analysis
Source: PubMed Central journal article supplement (PMC9403762; doi:10.3389/fpubh.2022.892973), 2022-08-11
Supplement: Table_3.pdf [file Table_3.pdf]

2.4. [If applicable:]  
Were there failures in implementing the intervention that could have affected the outcome?

PN N PN PN PN N N PY N N N N N N PN N N N N

2.5. [If applicable:]  
Was there non-adherence to the assigned intervention regimen that could have affected participants' outcomes?

N N PN PN PN N N PY N N N N N N PN N N N N

2.6. If N/PN/NI to 2.3, or Y/PY/NI to 2.4 or 2.5:  
Was an appropriate analysis used to estimate the effect of adhering to the intervention?

NA NA NA NA NA NA NA NA PY NA NA

3.1 Were data for this outcome available for all, or nearly all, participants randomized?

PY Y PY PY PN Y Y PY Y Y PN PY PY Y PY PN PN PN Y

3. Missing outcome data

3.2 If N/PN/NI to 3.1: Is there evidence that the result was not biased by missing outcome data?

NA NA NA NA N NA NA NA NA NA NA N NA NA NA NA N N N NA

|                              |                                                                                                 |    |    |    |    |    |    |    |    |    |    |    |    |    |    |    |    |    |    |    |
|------------------------------|-------------------------------------------------------------------------------------------------|----|----|----|----|----|----|----|----|----|----|----|----|----|----|----|----|----|----|----|
|                              | 3.3 If N/PN to 3.2: Could missingness in the outcome depend on its true value?                  | NA | NA | NA | NA | PN | NA | NA | NA | NA | NA | PN | NA | NA | NA | NA | PN | PN | PN | NA |
|                              | 3.4 If Y/PY/NI to 3.3: Is it likely that missingness in the outcome depended on its true value? | NA | NA | NA | NA | NA | NA | NA | NA | NA | NA | NA | NA | NA | NA | NA | NA | NA | NA | NA |
| 4.Measurement of the outcome | 4.1 Was the method of measuring the outcome inappropriate?                                      | N  | N  | N  | N  | N  | N  | N  | N  | N  | N  | N  | N  | N  | N  | N  | N  | N  | N  | N  |

4.2 Could measurement or ascertainment of the outcome have differed between intervention groups?

N N N N N N N N N N N N N N N N N N N N

4.3 If N/PN/NI to 4.1 and 4.2: Were outcome assessors aware of the intervention received by study participants?

N PN PN NI PN

4.4 If Y/PY/NI  
to 4.3:  
Could  
assessment of  
the  
outcome have  
been  
influenced by  
knowledge  
of intervention  
received?

NA NA NA N N N N N N N N N N N N N N N N NA

4.5 If Y/PY/NI  
to 4.4: Is it  
likely that  
assessment of  
the outcome  
was  
influenced by  
knowledge  
of intervention  
received?

NA NA

|                                    |                                                                                                                                                                                            |    |    |    |    |    |    |    |    |    |    |    |    |    |    |    |    |    |    |    |    |
|------------------------------------|--------------------------------------------------------------------------------------------------------------------------------------------------------------------------------------------|----|----|----|----|----|----|----|----|----|----|----|----|----|----|----|----|----|----|----|----|
| 5.Selection of the reported result | <p>5.1 Were the data that produced this result analysed in accordance with a pre-specified analysis plan that was finalized before unblinded outcome data were available for analysis?</p> | PY | PY | PY | PY | PY | PY | PY | PY | PY | PY | PY | PY | PY | PY | PY | PY | PY | PY | PY | PY |
|------------------------------------|--------------------------------------------------------------------------------------------------------------------------------------------------------------------------------------------|----|----|----|----|----|----|----|----|----|----|----|----|----|----|----|----|----|----|----|----|



5.2. Is the numerical result being assessed likely to have been selected, on the basis of the results, from multiple eligible outcome measurements (e.g. scales, definitions, time points) within the outcome domain?

N N N N N N N N N N N N N N N N N N N N

5.3 Is the numerical result being assessed likely to have been selected, on the basis of the results, from multiple eligible analyses of the data?

PN PN
